1 **Expression of a gene for an MLX56 defense protein derived from mulberry latex confers**  
2 **strong resistance against a broad range of insect pests on transgenic tomato lines**

3

4 Mika Murata<sup>1</sup>, Kotaro Konno<sup>2\*</sup>, Naoya Wasano<sup>3</sup>, Atsushi Mochizuki<sup>4&</sup>, Ichiro Mitsuhashi<sup>2\*</sup>

5 <sup>1</sup>Institute of Vegetable and Floriculture Science, National Agriculture and Food Research  
6 Organization (NARO), Mie Prefecture, Japan

7 <sup>2</sup>Institute of Agrobiological Sciences, NARO, Ibaraki Prefecture, Japan

8 <sup>3</sup>Department of Science, University of Toyama, Toyama Prefecture, Japan

9 <sup>4</sup>Institute of Agro-Environmental Sciences, NARO, Ibaraki Prefecture, Japan

10

11 \*Corresponding author

12 E-mail: [mituhara@affrc.go.jp](mailto:mituhara@affrc.go.jp) (IM), [konno@affrc.go.jp](mailto:konno@affrc.go.jp) (KK),

13

14 &Deceased November 2017

15

16

17

18

19

20

21

22

23

24

25

26

27

28

29

30

31

32

33

34

35

36

37 **Abstract**

38

39 Insect pests cause serious damage in crop production, and various attempts have been made to  
40 produce insect-resistance crops, including the expression of genes for proteins with anti-herbivory  
41 activity, such as BT toxins. However, the number of available genes with sufficient anti-herbivory  
42 activity is limited. MLX56 is an anti-herbivory protein isolated from the latex of mulberry plants,  
43 and has been shown to have a strong growth-suppressing activity against the larvae of a variety of  
44 lepidopteran species. As a model of herbivore-resistant plants, we produced transgenic tomato lines  
45 expressing the gene for MLX56. The transgenic tomato lines showed strong anti-herbivory activities  
46 against the larvae of the common cutworm, *Spodoptera litura*. Surprisingly, the transgenic tomato  
47 lines also exhibited strong activity against the attack of the western flower thrips, *Frankliniera*  
48 *occidentalis*. Further, growth of the hadda beetle, *Henosepilachna vigintioctopunctata* fed on leaves  
49 of transgenic tomato was significantly retarded. The levels of damage caused by both western flower  
50 thrips and hadda beetles were negligible in the high-MLX56-expressing tomato line. These results  
51 indicate that introduction of the gene for MLX56 into crops can enhance crop resistance against a  
52 wide range of pest insects, and that MLX56 can be utilized in developing pest-resistance GM crops.

53

54 **Introduction**

55 Damage due to feeding insects has a large impact on crop production, reducing both the amount and  
56 quality of the product. Also, herbivore damage enhances vulnerability to infection, and some  
57 herbivores act as vectors of pathogens. Therefore, considerable costs have been expended to protect  
58 crops from herbivores, and protective agents against herbivores are continuously being developed.  
59 The primary protective agents against herbivores have been pesticides, and some insect-resistant  
60 traits have been introduced by traditional breeding. In recent decades, many transgenic approaches  
61 have been taken to produce herbivore-resistant crops by introducing genes for anti-insect proteins,  
62 such as inhibitors of the digestive enzymes of herbivores or lectins. Most attempts, however, have  
63 been unsuccessful in practical use, except for the cases of Bt (*Bacillus thuringiensis*) toxins, which  
64 showed sufficient toxicity to pests in very low concentrations [1].

65 Introduction of genes for Bt toxins such as Cry1Ab, resulted in strong resistance against insect  
66 pests sensitive to Bt toxins. Many transgenic crops into which the genes for Bt toxins were  
67 introduced, such as maize, soybean, and cotton, are commercially successful and cultivated  
68 worldwide [1]. However, each of the Bt toxins is effective only for a limited range of insect pests,  
69 such as the corn earworm, *Helicoverpa zea* (Lepidoptera: Noctuidae), and the European corn borer,  
70 *Ostrinia nubilalis* (Lepidoptera: Crambidae) [2]. Indeed, no Bt proteins are known to be effective  
71 against all lepidopteran insects. To obtain transgenic crops with resistance against various types of  
72 insect pests at the same time, it would be necessary to introduce multiple Bt genes (proteins) with

73 different toxic spectra simultaneously. In addition to the drawback that Bt has a narrow toxic  
74 spectrum against insect pests, the incidence of Bt-resistant pests is increasing [3, 4]. Therefore, there  
75 is a great need for the discovery of novel anti-insect proteins with strong anti-insect activities and  
76 broad toxic spectrum against insect pests.

77 The MLX56 protein was isolated from the latex of mulberry trees as a potent growth-suppressing  
78 protein active against the larvae of lepidopteran species [5]. MLX56 is a highly glycosylated protein  
79 with an apparent molecular mass of around 56kDa. It has a unique structure compared to other  
80 anti-insect proteins with an extensin domain, which is proline-rich and highly arabinosylated,  
81 surrounded by two chitin-binding domains (hevein domains) in its N' region, and in C' region, with a  
82 chitinase-like domain containing mutations that result in an absence of chitinase activity. MLX56  
83 inhibited the growth of the larvae of lepidopteran species such as the cabbage armyworm, *Mamestra*  
84 *brassicae* (Lepodoptera: Noctuidae) and the Eri silkworm, *Samia ricini* (Lepodoptera: Satuniidae) at  
85 extremely low concentrations (0.01-0.03% / wet artificial diet) [5]. In addition, MLX56 and its close  
86 homolog LA-b showed toxicity to the larvae of fruit flies reared on a diet containing MLX56 [6, 7].  
87 These observations suggest that the MLX56 family proteins (MLX56 and its homologs) have strong  
88 anti-herbivore activity against a wide range of insects. Interestingly, growth of the silkworm,  
89 *Bombyx mori*, a mulberry specialist, was not at all suppressed by MLX56 or by MLX56-containing  
90 mulberry latex, suggesting that as a mulberry specialist *B. mori* may have developed some adaptive  
91 mechanism to MLX56 and other latex toxins (e.g., sugar-mimic alkaloids) as mulberry specialist [5,  
92 8, 9, 10].

93 A recent study showed that not only the MLX56 structure, but also the mode of the anti-insect  
94 action of MLX56 is unique [11]. Specifically, the study showed that the peritrophic membrane (PM;  
95 a thin membrane wrapping food material in the midgut of insects) in the midgut of the *Eri silkworm*,  
96 *S. ricini*, exhibited abnormal swelling when fed a diet containing MLX56. The findings suggested  
97 that the hevein domains of MLX56 bind to chitin containing PM, that the swelling of PM is induced  
98 by the swelling activity of the extensin domain, and that the swollen thick PM suppresses insect  
99 growth by functioning as a barrier against the movement of nutrient and digestive enzymes in the  
100 midgut of insects [11, 12]. MLX56 may inhibit the growth of insects belonging to taxa other than  
101 Lepidopteran in similar ways, because insects belonging to most insect taxa have PM in their midgut.  
102 However, insects belonging to taxa such as Thysanoptera lack PM [13], and therefore whether or not  
103 MLX56 can exert a growth inhibitory activity against thrips is an interesting open question.

104 Thrips attack a wide range of crops worldwide and cause serious damage to production,  
105 especially in greenhouse cultivation. Control of the thrips is difficult because of their tiny body sizes  
106 and ability to develop pesticide resistance [14, 15]. In addition, thrips act as vectors of viral diseases.  
107 For instance, the western flower thrips, *Frankliniera occidentalis* (Thysanoptera: Thripidae), is  
108 known to be a vector for tospoviruses, including tomato spotted wilt virus (TSWV) and impatiens

109 necrotic spot virus (INSV) [16, 17]. Therefore, novel protection methods to control thrips are needed,  
110 and it seems worthwhile to examine whether MLX56 could be effective. Meanwhile, the hadda  
111 beetle, *Henosepilachna vigintioctopunctata* (Coleoptera: Henosepilachna), is known to be an  
112 important pest in Solanaceae crops such as potato and eggplant in several countries, including  
113 Taiwan, China and India [18, 19]. Screening of varieties for resistance to *H. vigintioctopunctata* has  
114 been studied [20, 21]. Hence, a breakthrough in control measures against this pest is also urgently  
115 needed.

116 Since the growth-inhibitory activity of MLX56 against insect herbivores is evident even at very  
117 low concentrations (ca. 0.01%-0.03%), MLX56 appears to be a useful protein in the effort to  
118 produce GM plants resistant to insect pests. We previously showed that transient expression of the  
119 gene for MLX56 can enhance plant resistance against the common cutworm, *Spodoptera litura*  
120 (Lepidoptera: Noctuidae), the cabbage armyworm, *M. brassicae*, and the diamondback moth,  
121 *Plutella xylostella* (Lepidoptera: Plutellidae) in tobacco, tomato or *Arabidopsis* plants [22]. In the  
122 present study, we produced transgenic tomato lines expressing the gene for MLX56, and then tested  
123 for resistance against the common cutworm (Lepidoptera), the western flower thrips (Thysanoptera)  
124 and the hadda beetle (Coleoptera).

125

## 126 **Methods**

### 127 **Production of a transgenic tomato plant**

128 A binary vector with a strong constitutive promoter::MLX56 gene [22] was used for the tomato plant  
129 transformation. The plasmid was introduced into *Agrobacterium* LBA4404 as an intermediate host.  
130 *Agrobacterium*-mediated transformation of the tomato plant cv. Micro-Tom was performed as  
131 described in Sun et al. (2006) [23]. A transgenic tomato plant transformed with the same  
132 promoter::Luciferase construct was also produced as a vector control plant.

133 Regenerated plants were planted in pots and grown in a growth chamber controlled at 25 °C and  
134 a 16h /8h light/dark photoperiod. Expression of the transgene was determined by qRT-PCR as  
135 described by Kawazu et al. (2012) [22]. Transgenic tomato plants with high-level expression of the  
136 gene for MLX56 were selected and transferred to an isolated greenhouse. Seeds obtained from  
137 primary transgenic plants were seeded onto kanamycin containing plates and kanamycin resistant  
138 progenies were used for further analysis.

139

### 140 **Partial purification and detection of MLX56 protein**

141 Leaves of second-generation of MLX56 expression tomato plants and vector control plant were  
142 excised, and 200 mg of fresh leaf pieces were homogenized with 800 µL of 20 mM Tris-HCL (pH  
143 9.5) supplemented with protease inhibitor cocktail (Complete Mini, Roche) using a mortar and pestle.  
144 The homogenate was centrifuged at 12,000 rpm for 5 min, and the supernatant was obtained as a

145 “crude extract”.

146 A slurry of chitin beads (New England BioLabs) preequilibrated to and then suspended in 2 vol.  
147 of the extraction buffer, and then 200  $\mu$ L of a slurry of chitin beads and 200  $\mu$ L of crude extract were  
148 each mixed and incubated for 10 min at room temperature. Then the mixtures were centrifuged at  
149 12,000 rpm for 5 min to separate “unbound sap” and protein-bound chitin beads. The chitin beads  
150 were washed 3 times with extraction buffer and the wash solution was deposited as the “wash  
151 fraction”. The chitin beads were then further washed with 200  $\mu$ L of 8 M of urea solution, and the  
152 urea supernatant was deposited as the “urea fraction”. Proteins tightly bound on the chitin beads  
153 were eluted and denatured by resuspension in 200 $\mu$ L of SDS sample buffer and by boiling for 5 min.  
154 Crude extract and the above fractions were then denatured in SDS-PAGE buffer for SDS-PAGE  
155 separation. Samples were separated by SDS-PAGE using a Mini-Protein Tera Cell system (Bio-Rad  
156 Laboratories, Inc., Hercules, USA, CA). Proteins were visualized by CBB staining as described  
157 elsewhere.

158

#### 159 **Insect resistance assay**

160 Eggs of cotton cutworm (*S. litura*) were purchased from Sumika Techno Service Co. (Takarazuka,  
161 Japan). Tomato leaves were excised with scissors, and two leaves were put in a 1.5mL microtube  
162 filled with distilled water to prevent leaves from drying. Ten hatchlings of *S. litura* were inoculated  
163 onto the two tomato leaves in a plastic container (15cm diameter  $\times$  8cm high) at  $25 \pm 1$  °C with a  
164 14L/10D photoperiod. The numbers of surviving larvae and instar numbers were recorded after 3, 6  
165 and 9 days. Differences in the numbers of surviving larvae and the proportion of the instar numbers  
166 were statistically compared using Tukey-Kramer HSD test after one-way ANOVA, and Ryan’s  
167 multiple-range test for proportions after the  $\chi^2$  test, respectively.

168 For evaluation of tomato resistance against the western flower thrips (*F. occidentalis*), 3- 4  
169 week- old potted tomato plants were transferred into separate transparent vessels (bottom diameter  
170 8.5 cm, top diameter 10.5 cm, height 14 cm) separately. Twenty adult female thrips were placed in  
171 each vessel and capped. The cap of the vessel had a window covered with nylon mesh for ventilation.  
172 The vessels containing tomato were incubated in a growth chamber at  $25 \pm 1$  °C with a 14L/10D  
173 photoperiod. The numbers of surviving adults, pupae and larvae were determined after two weeks.  
174 Fifteen plants were used for each strain of transgenic tomato line. Data on survival rates were  
175 analyzed by Tukey-Kramer HSD test after one-way ANOVA.

176 Hadda beetles (*H. vigintioctopunctata*) that were collected in Tsukuba, Japan, and then kept in  
177 the laboratory in Tsukuba for two generations were used for bioassays. Each group of 12 newly  
178 hatched first instar larvae was fed excised leaves of either the control line (Micro-Tom) or the  
179 transgenic lines (line 69 or line 73) for 9 days in an incubator at 25 °C with a 16L/8D photoperiod.  
180 Leaves were replaced by new ones every other day, the body weight of each larvae was measured,

181 and then the data were statistically analyzed using Tukey's test for multiple comparisons.

182 These analyses were conducted using R version 4.0.2 [24].

183

## 184 **Results**

### 185 **Production of the MLX56-overproducing tomato plant**

186 A tomato plant (cv. Micro-Tom) was transformed with MLX56 containing the expression vector  
187 pE12Omega. The expression vector enables a high expression of foreign gene monocot and dicot  
188 plants [25, 26]. Expression of the gene for MLX56 in each regenerated tomato plant was analyzed by  
189 qRT-PCR, and two lines, MLX56-69 and -73, were selected as highly expressing strains. Second-  
190 generation seedlings of each transgenic line were selected by kanamycin, and levels of mRNA for  
191 MLX56 were determined at the 4 leaves stage (Fig. 1). High-level expression of the transgene was  
192 confirmed, and the levels of the mRNA for in MLX56-73 was approximately double that in  
193 MLX56-69.

194 The growth of each transgenic line was compared to that of the control plants with the  
195 pE12Omega-containing gene for luciferase. Total weights of the transgenic lines grown in a growth  
196 chamber were not different from those of controls. Further, the yields of fruits harvested in the  
197 greenhouse were also similar between the transgenic lines and the controls.

198

### 199 **Detection of MLX56 protein in the transgenic tomato plant**

200 Unfortunately, we could not obtain antibodies against the MLX56 protein with enough specific  
201 activity, and so we could not confirm production of the MLX56 protein by gel blot analysis. Instead,  
202 we tried to detect MLX56 protein as a chitin-binding protein. Chitin-binding proteins in the leaf  
203 extract of transgenic plants with the MLX56 gene or vector control were partially purified using  
204 chitin beads and separated by SDS-PAGE (Fig 2). A chitin-binding protein of around 56 kDa was  
205 detected from transgenic plants with MLX56 but not from control plants, suggesting that the gene  
206 for MLX56 produced a 56 kDa chitin-binding protein.

207

### 208 **Insect resistance assay**

209 To assess whether the MLX56-expressing tomato plants exhibited enhanced resistance against  
210 lepidopteran herbivores, larvae of *S. litura* were fed on excised leaves from each plant. The number  
211 of surviving *S. litura* larvae fed on the 69 line was significantly lower than the number of surviving  
212 larvae fed on leaves of the control on day 3, and the number of surviving larvae fed on the 73 line  
213 was significantly lower than that of surviving larvae fed on the control on days 6 and 9 (Fig. 3A)  
214 (day 3:  $p < 0.005$ ,  $F = 8.1033$ , day 6:  $p < 0.05$ ,  $F = 4.1923$ , day 9:  $p < 0.01$ ,  $F = 5.8973$ ). This  
215 confirmed the enhanced resistance against the lepidopteran herbivores by expression of the MLX56  
216 gene. The proportion of larval instars on day 3 was significantly different from that in lines 69 and

217 73 ( $\chi^2 = 22.12$ ,  $p < 0.001$ ). On day 6, the proportion of 3<sup>rd</sup> instar larvae in the control was  
218 significantly lower than that in line 69, and followed by line 73 ( $\chi^2 = 13.60$ ,  $p < 0.005$ ). On the other  
219 hand, there was no significant difference in the proportion on day 9 among the three lines ( $\chi^2 = 1.95$ ,  
220  $p > 0.05$ ).

221 Transgenic plants were then infested by thrips to evaluate the effect of MLX56 on herbivores  
222 other than Lepidoptera. The numbers of surviving thrips were adversely affected by transgenic  
223 tomato plants; after two weeks low numbers of surviving individuals were observed for line 73,  
224 followed by line 69 and the control (Fig. 4A) ( $p < 0.0001$ ,  $F = 14.325$ ). The feeding damage to  
225 tomato leaves by thrips was also less severe in line 73, followed by line 69 and the control (Fig. 4B  
226 and C). These results indicate that the expression of the gene for MLX56 is also effective against  
227 thrips.

228 Regarding the hadda beetle, all neonate individuals (body mass: 0.14mg) fed either leaves of the  
229 control line, line 69 (moderate MLX56-expressing line), or line 73 (high MLX56-expressing line)  
230 survived for 9 days, but the body size of the larvae fed leaves of line 69 was somewhat smaller than  
231 that of those fed leaves of the control, and the body size of larvae fed line 73 was much and  
232 obviously smaller than the size of those fed the leaves of the control line (Fig. 5A). The body weight  
233 of larvae fed line 69 for 9 days ( $12.77 \pm 0.81$  mg, average  $\pm$  SD) was significantly but moderately  
234 smaller than those fed the control line ( $18.28 \pm 0.98$ mg); that of the larvae fed leaves of line 73 ( $1.25$   
235  $\pm 0.12$ mg) was significantly smaller than those of both the larvae fed control leaves and the larvae  
236 fed leaves of line 69 (Fig. 5B) ( $p < 0.0001$ ,  $F = 139.062$ ). All larvae were 3<sup>rd</sup> instar in the control and  
237 69 lines, while only two larvae were 3<sup>rd</sup> instar and the remaining 10 larvae were 2<sup>nd</sup> instar in the 73  
238 line. These results demonstrated that the expression of the MLX56 gene is also effective against the  
239 hadda beetle, and that the growth-inhibiting activities of MLX56-expressing lines are well correlated  
240 with the expression level of MLX56.

241

## 242 **Discussion**

243 We produced transgenic tomato lines that overproduce the anti-herbivory protein MLX56. The  
244 transgenic tomato lines exhibited considerable tolerance against Lepidoptera larvae *S. litura*, as  
245 expected. The significant difference in the proportions of the larval instars on days 3 and 6 suggests  
246 that MLX56 serves to delay the development and/or reduce the survival rates during younger stages.  
247 Therefore, it is possible that with this effect, MLX56 protects crops from *S. litura* by preventing  
248 and/or delaying the emergence of older instar larvae that damage crops much more than younger  
249 instar ones. Further, these transgenic plants were remarkably resistant to *F. occidentalis* and *H.*  
250 *vigintioctopunctata*. The resistance of the line 73 tomato plant was so strong that the damage by  
251 thrips on the tomato line was negligible, and that the growth of hadda beetle was minimal. Therefore,  
252 MLX56 expression confers a resistance level to plants that is sufficiently strong to be practically

253 utilized in agriculture like Bt toxin.

254 MLX56 was previously identified as an anti-herbivory defense protein of mulberry against  
255 lepidopteran herbivores [5, 11]. Although the molecular mechanism of MLX56 has not been fully  
256 determined, the protein is known to cause abnormal swelling of the PM, probably through its  
257 binding to chitin of the membrane, and the swollen PM is suggested to function as a barrier to the  
258 digestive processes of insects. The resistance level that MLX56 expression confers to plants is  
259 sufficiently strong to be practically utilized in agriculture like Bt toxin.

260 Surprisingly, ectopic expression of MLX56 also enhanced resistance against thrips, which have  
261 no PM [13]. At present, the mode of action and target of MLX56 in thrips are unclear, but chitin is  
262 everywhere in the body of all insects, including thrips, and there may be an additional/alternative  
263 chitin-containing targets of MLX56 in thrips, like the PM like structure in the midgut, cuticle in the  
264 foregut and hindgut, mouth parts, trachea, etc. The defensive mode of action of MLX56 in thrips  
265 should be examined in the future.

266 Constitutive high expression of the gene for MLX56 was achieved by using the expression  
267 vector pEl2Omega, which has 10-20 times higher activity than the CaMV 35S promoter, which is  
268 known to be strong in plants. The transgenic tomato line with higher expression of MLX56  
269 (MLX56-73) exhibited higher resistance against thrips and beetles than the one with relatively less  
270 expression (MLX56-69), suggesting that a higher expression of MLX56 is required to provide high  
271 tolerance against insect pests. If the expression level is sufficiently high, the resistance level will be  
272 high enough to be effective against insect pests in practical agricultural use.

273 Various attempts have been made to produce transgenic crops with herbivore resistance by  
274 introducing plant-originated anti-herbivory genes; however, none are in practical commercial use at  
275 present. Meanwhile, the bacterial insecticidal gene BT has been successfully used to introduce  
276 herbivore resistance to crops worldwide. In particular, a considerable number of commercial  
277 cultivars of maize and soybean contain the BT gene, because it conveys potent resistance, and many  
278 types of BT gene have been reported. Despite its potent insecticidal activity, however, each type of  
279 BT has a relatively narrow action spectrum, and is effective only against limited types of pest insects.  
280 Therefore, a transgenic crop with one BT gene can resist only limited kinds of herbivores and  
281 multiple types of BT genes must be introduced to produce a transgenic crop with resistance against  
282 multiple herbivores. Further, the emergences of BT-resistant varieties of herbivore is frequently  
283 reported. Thus, potent anti-herbivory genes with a wide action spectrum and a different action  
284 mechanism than BT are needed to produce useful transgenic crops with resistance against various  
285 types of insect pests.

286 We consider that the gene for MLX56 could be a solution to the problem described above.  
287 Compared to GM plant production using Bt, the great advantage of producing pests resistant GM  
288 crops using MLX56 is that expressing a single MLX56 protein can confer sufficiently strong and



289 broad resistance to important economical pests from various insect taxa such as thrips  
290 (Thysanoptera), ladybird beetles (Coleoptera), and cutworm (Lepidoptera) at the same time. Also,  
291 the performance of tomato as a crop does not seem to be compromised by the expression of MLX56.  
292 Therefore, introduction of the gene for MLX56 will be a promising and practical way to produce  
293 pest-resistant crops against a wide range of herbivores. Further, as the action mechanism of BT and  
294 MLX56 are different, simultaneous introduction of genes for BT and MLX56 may enlarge the action  
295 spectrum of the resistance and suppress occurrence of resistant varieties. We are currently  
296 introducing the gene for MLX56 under the control of an improved expression vector to evaluate the  
297 feasibility of MLX56 in different crops and herbivores.

298

### 299 **Acknowledgments**

300 We thank Masumi Teruse, Chiaki Kimoto, Yuki Suzuki, Sachiko Gonokami, Kayoko Furukawa for  
301 technical assistance.

302

303

### 304 **Author Contributions**

305 Conceptualization: Kotaro Konno, Atsushi Mochizuki, Ichiro Mitsuahara.

306 Formal analysis: Mika Murata, Kotaro Konno, Ichiro Mochizuki.

307 Supervision: Ichiro Mitsuahara, Kotaro Konno.

308 Validation: Kotaro Konno, Naoya Wasano.

309 Writing – original draft: Mika Murata, Kotaro Konno, Ichiro Mitsuahara.

310 Writing – review & editing draft: Mika Murata, Naoya Wasano, Kotaro Konno, Ichiro Mitsuahara.

311

### 312 **References**

313 1. Sanahuja G, Banakar R, Twyman R, Capell T, Christou P. *Bacillus thuringiensis*: a century of  
314 research, development and commercial applications. *Plant Biotechnol J*. 2011; 9: 283-300. doi:  
315 10.1111/j.1467-7652.2011.00595.x.

316 2. Hilder V, Boulter D. Genetic engineering of crop plants for insect resistance – a critical review.  
317 *Crop Prot* 1999; 18: 177-191. doi: 10.1016/S0261-2194(99)00028-9

318 3. Gassmann AJ, Petzold-Maxwell JL, Keweshan RS, Dunbar MW. Field-evolved resistance to Bt  
319 maize by western corn rootworm. *PLoS One*. 2011; 6: e2269.  
320 doi: 10.1371/journal.pone.0022629.

321 4. Gassmann AJ, Petzold-Maxwell JL, Clifton EH, Dunbar MW, Hoffmann AM, Ingber D. A.  
322 Field-evolved resistance by western corn rootworm to multiple *Bacillus thuringiensis* toxins in  
323 transgenic maize. *Proc Natl Acad Sci USA*. 2014; 111: 5141–5146.  
324 doi: 10.1073/pnas.1317179111.

- 325 5. Wasano N, Konno N, Nakamura M, Hirayama C, Hattori M, Tateishi K. A unique latex protein,  
326 MLX56, defends mulberry trees from insects. *Phytochemistry*. 2009; 70: 880-888.  
327 doi: 10.1016/j.phytochem.2009.04.014.
- 328 6. Kitajima S, Kamei K, Taketani S, Yamaguchi M, Kawai F, Komatsu A, et al. Two chitinase-like  
329 proteins abundantly accumulated in latex of mulberry show insecticidal activity. *BMC Biochem*.  
330 2010; 11: 6. doi: 10.1186/1471-2091-11-6.
- 331 7. Kitajima S, Taira T, Oda K, Yamato KT, Inukai Y, Hori Y. Comparative study of gene  
332 expression and major proteins' function of laticifer in lignified and unlignified organs of  
333 mulberry. *Planta*. 2012; 235: 589-601. doi: 10.1007/s00425-011-1533-6.
- 334 8. Konno K, Ono H., Nakamura M, Tateishi K, Hirayama C, Tamura Y, et al. (2006) Mulberry  
335 latex rich in antidiabetic sugar-mimic alkaloids forces dieting on caterpillars. *Proc Natl Acad Sci*  
336 *USA*. 2006; 103: 1337-1341. doi: 10.1073/pnas.0506944103.
- 337 9. Hirayama C, Konno K, Wasano N, Nakamura M. Differential effects of sugar-mimic alkaloids in  
338 mulberry latex on sugar metabolism and disaccharidases of *Eri* and domesticated silkworm:  
339 enzymatic adaptation of *Bombyx mori* to mulberry defense. *Insect Biochem Mol Biol*. 2007; 37:  
340 1348-1358. doi: 10.1016/j.ibmb.2007.09.001.
- 341 10. Konno K. Plant latex and other exudates as plant defense systems: roles of various defense  
342 chemicals and proteins contained therein. *Phytochemistry*. 2011; 72: 1510-1530.  
343 doi: 10.1016/j.phytochem.2011.02.016.
- 344 11. Konno K, Shimura S, Ueno C, Arakawa T, Nakamura M. Abnormal swelling of the peritrophic  
345 membrane in *Eri* silkworm gut caused by MLX56 family defense proteins with chitin-binding  
346 and extension domains. *Phytochemistry*. 2018; 147: 211-219.  
347 doi: 10.1016/j.phytochem.2018.01.005.
- 348 12. Konno K, Mitsunashi W. The peritrophic membrane as a target of protein that play important  
349 roles in plant defense and microbial attack. *J Insect Physiol*. 2019; 117: 103912.  
350 doi: 10.1016/j.jinsphys.2019.103912.
- 351 13. Terra WR, Barroso IG, Dias RO, Ferreira C. Molecular physiology of insect midgut. *Adv in*  
352 *Insect Phys*. 2019; 56: 117-163.
- 353 14. Cannon RJC, Matthews L, Collins DW. A review of the pest status and control options for  
354 *Thrips palmi*. *Crop Prot*. 2007; 26: 1089-1098. doi: 10.1016/j.cropro.2006.10.023
- 355 15. Gao Y, Zhongren L, Reitz SR. Western flower thrips resistance to insecticides detection,  
356 mechanisms and management strategies. *Pest Manag Sci*. 2012; 68: 1111-1121. doi:  
357 10.1002/ps.3305
- 358 16. Wijkamp I, Lent J van, Kormelink R, Goldbach R, Peters D. Multiplication of tomato spotted  
359 wilt virus in its insect vector, *Frankliniella occidentalis*. *J Gen Virol*. 1993; 74: 341-349. doi:  
360 10.1099/0022-1317-74-3-341.

- 361 17. Sakurai T, Inoue T, Tsuda S. Distinct efficiencies of Impatiens necrotic spot virus transmission  
362 by five thrips vector species (Thysanoptera: Thripidae) of tospoviruses in Japan. Appl Entomol  
363 Zool. 2004; 39(1): 71-78. doi: 10.1303/aez.2004.71.
- 364 18. Ghosh SK, Chakraborty G. Integrated field management of *Henosepilachna*  
365 *vigintioctopunctata* (Fabr.) on potato using botanical and microbial pesticides. J Biopest. 2012;  
366 5: 151-154.
- 367 19. Wang ZL, Li CR, Yuan JJ, Li SX, Wang XP, Chi H. Demographic comparison of  
368 *Henosepilachna vigintioctopunctata* (F.) (Coleoptera: Coccinellidae) reared on three cultivars of  
369 *Solanum melongena* L. and a wild hostplant *Solanum nigrum* L. Journal of Econ Entomol. 2017;  
370 110: 2084-2091. doi: 10.1093/jee/tox207.
- 371 20. Barik S, Dash L, Das MP, Panigrahi T, Naresh P, Kumari M, et al. Screening of brinjal  
372 (*Solanum melongena* L.) genotypes for resistance to spotted beetle, *Henosepilachna*  
373 *vigintioctopunctata*. J Entomol Zool Stud. 2020; 8: 297-301.
- 374 21. Elanchezhyan K, Baskaran RK, Rajavel DS. Field screening of brinjal varieties on major pests  
375 and their natural enemies. J Biopest. 2008; 1(2): 113-120.
- 376 22. Kawazu K, Wasano N, Konno K, Ohashi Y, Mochizuki A, Mitsuahara I. Evaluation of  
377 anti-herbivory genes using an Agrobacterium-mediated transient expression system. Plant  
378 Biotechnol. 2012; 29: 495-499. doi: 10.5511/plantbiotechnology.12.0711a
- 379 23. Sun HJ, Uchii S, Watanabe S, Ezura H. A highly efficient transformation protocol for micro-tom,  
380 a model cultivar for tomato functional genomics. Plant Cell Physiol. 2006; 47: 426-431. doi:  
381 10.1093/pcp/pci251.
- 382 24. R Development Core Team. R: A language and environment for statistical computing. R  
383 foundation for statistical computing, Vienna. <https://www.r-project.org> (accessed on 4 August  
384 2020).
- 385 25. Mitsuahara I, Uaki M, Hirochika H, Ohshima M, Murakami T, Gotoh Y, et al. Efficient Promoter  
386 cassettes for enhanced expression of foreign genes in dicotyledonous and monocotyledonous  
387 plants. Plant Cell Physiol. 1996; 37: 49-59. doi: 10.1093/oxfordjournals.pcp.a028913.
- 388 26. Ohtsubo N, Mitsuahara I, Koga M, Seo S, Ohashi Y. Ethylene promotes the necrotic lesion  
389 formation and basic PR gene expression in TMV-infected tobacco. Plant Cell Physiol. 1999; 40:  
390 808-817. doi: 10.1093/oxfordjournals.pcp.a029609.

391

## 392 **Figure captions**

393

394 Fig. 1. Production of the transgenic tomato plant. Structure of the introduced transgene: the  
395 expression vector pEl2Omega with the gene for MLX56 (Kawazu et al., 2012) was used for tomato  
396 transformation. The vector has the duplicated CaMV 35S transcriptional enhancer and TMV omega

397 translational enhancer for overproduction of the transgene (A). Detection of mRNA for MLX56 in  
398 transgenic tomato leaves: the level of mRNA for MLX56 was determined by qRT-PCR using the  
399 primers, MLX56RT51 (5'-CCAAGTCCACCTCCACCAAGTC-3') and MLX56RT31  
400 (5'-TTTCCGAGGGCTCTTCCACATC-3) (Kawazu et al., 2012). The level of mRNA for actin was  
401 used as an internal control (B).

402

403 Fig. 2. Partial purification of the chitin-binding protein in a transgenic tomato plant with the gene for  
404 MLX56. The chitin-binding protein of the control and MLX56-transformed tomato plant  
405 (MLX56-73-30) were partially purified using chitin beads. The crude extract and each partially  
406 purified fraction were separated by SDS-PAGE and visualized by CBB. T: total crude extract; S:  
407 unbound supernatant; W: wash fraction by extraction buffer; U: wash fraction by urea, E: eluted  
408 fraction after SDS denaturation that tightly bound to chitin.

409

410 Fig. 3. Effects of transgenic tomato on the numbers of surviving individuals and development of *S.*  
411 *litura* larvae. Numbers of surviving individuals from inoculation to 9 days (A). Proportions of the  
412 larval instars reared on each tomato line after 3, 6 and 9 days (B). Error bars indicate SE (n = 10).  
413 Values not followed by the same letters were significantly different among the three lines at the  
414 same day by Tukey-Kramer HSD test (day 3:  $p < 0.005$ ,  $F = 8.1033$ ; day 6:  $p < 0.05$ ,  $F = 4.1923$ ; day  
415 9:  $p < 0.01$ ,  $F = 5.8973$ ).

416

417 Fig. 4. Effects of transgenic tomato on the numbers of surviving individuals of *F. occidentalis* (A),  
418 and the damage to tomato plants (B) and leaves (C) by the thrips after two weeks. Error bars indicate  
419 SE (n = 15). Values not followed by the same letters were significantly different (Tukey-Kramer  
420 HSD test:  $p < 0.0001$ ,  $F = 14.325$ ).

421

422 Fig. 5. The effect of MLX56 on *H. vigintioctopunctata* larvae. Twelve newly hatched larvae (0.14  
423 mg) were fed tomato leaves of either the control, 69, or 73 line for 9 days, and then, larval weights  
424 were then measured. Larval body size (A), and average body weights (B) on day 9. Error bars  
425 indicate SE (n = 12). Values not followed by the same letters were significantly different (Tukey's  
426 test for multiple comparison,  $p < 0.0001$ ,  $F = 139.1$ ).

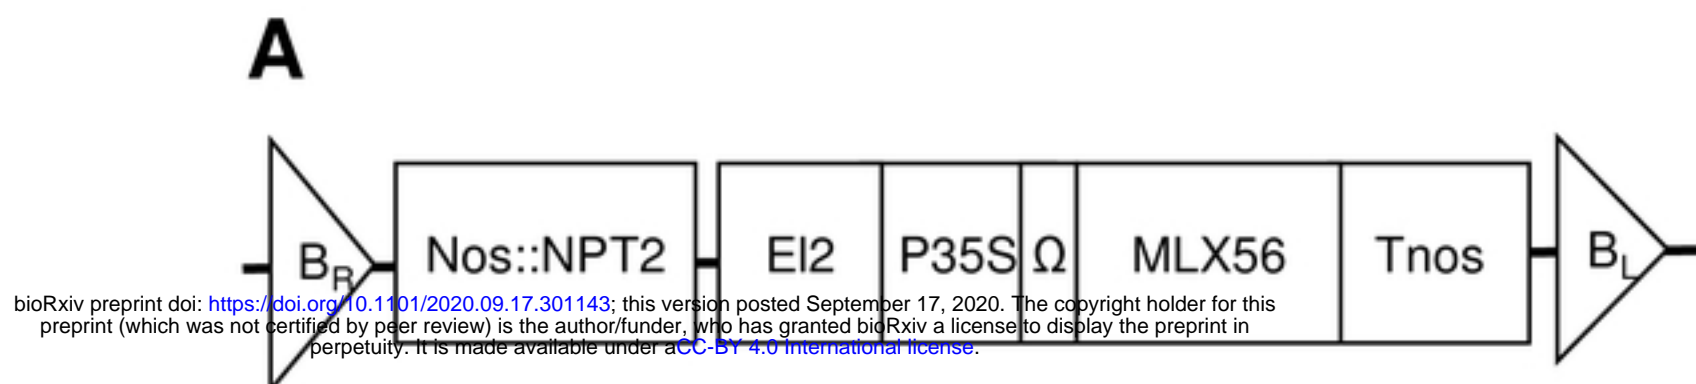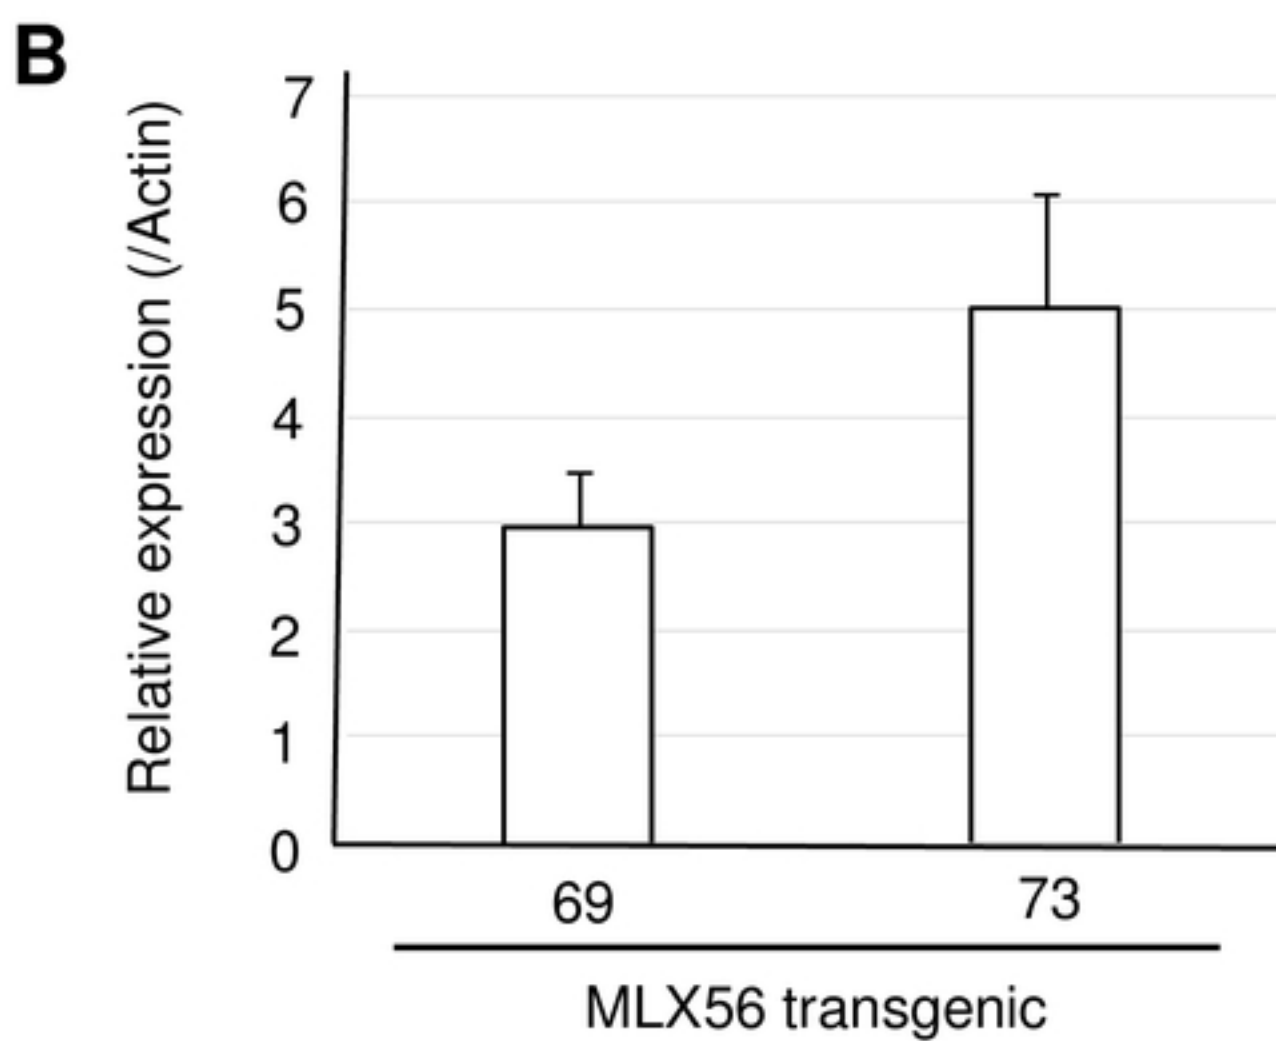

Fig.1

bioRxiv preprint doi: <https://doi.org/10.1101/2020.09.17.301143>; this version posted September 17, 2020. The copyright holder for this preprint (which was not certified by peer review) is the author/funder, who has granted bioRxiv a license to display the preprint in perpetuity. It is made available under aCC-BY 4.0 International license.

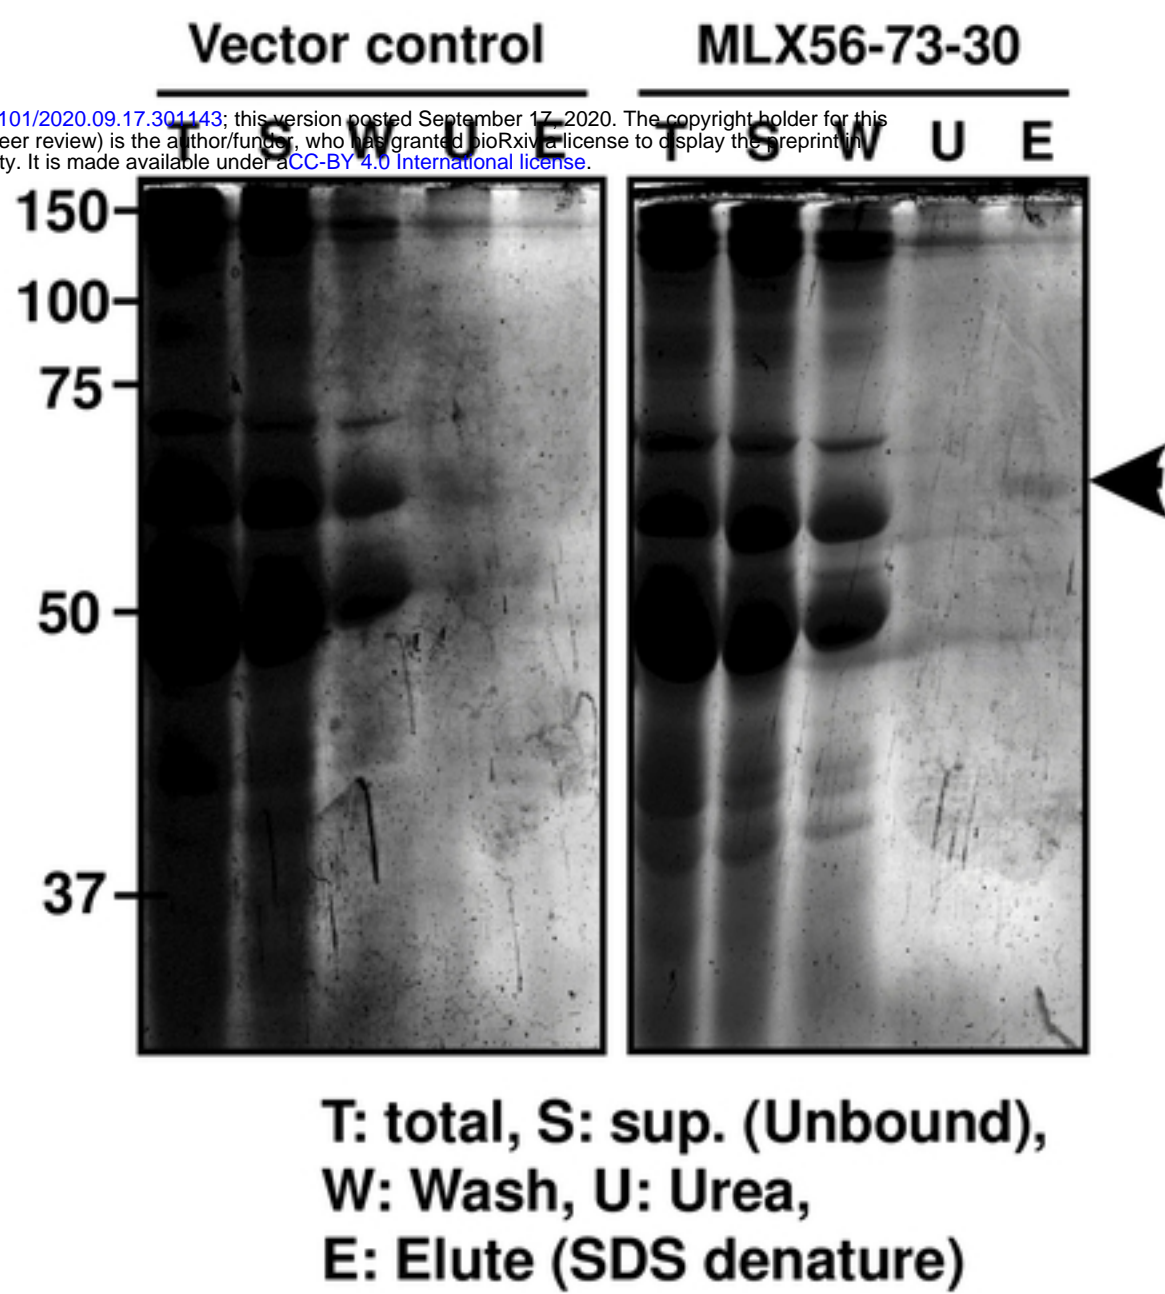

bioRxiv preprint doi: <https://doi.org/10.1101/2020.09.17.301143>; this version posted September 17, 2020. The copyright holder for this preprint (which was not certified by peer review) is the author/funder, who has granted bioRxiv a license to display the preprint in perpetuity. It is made available under aCC-BY 4.0 International license.

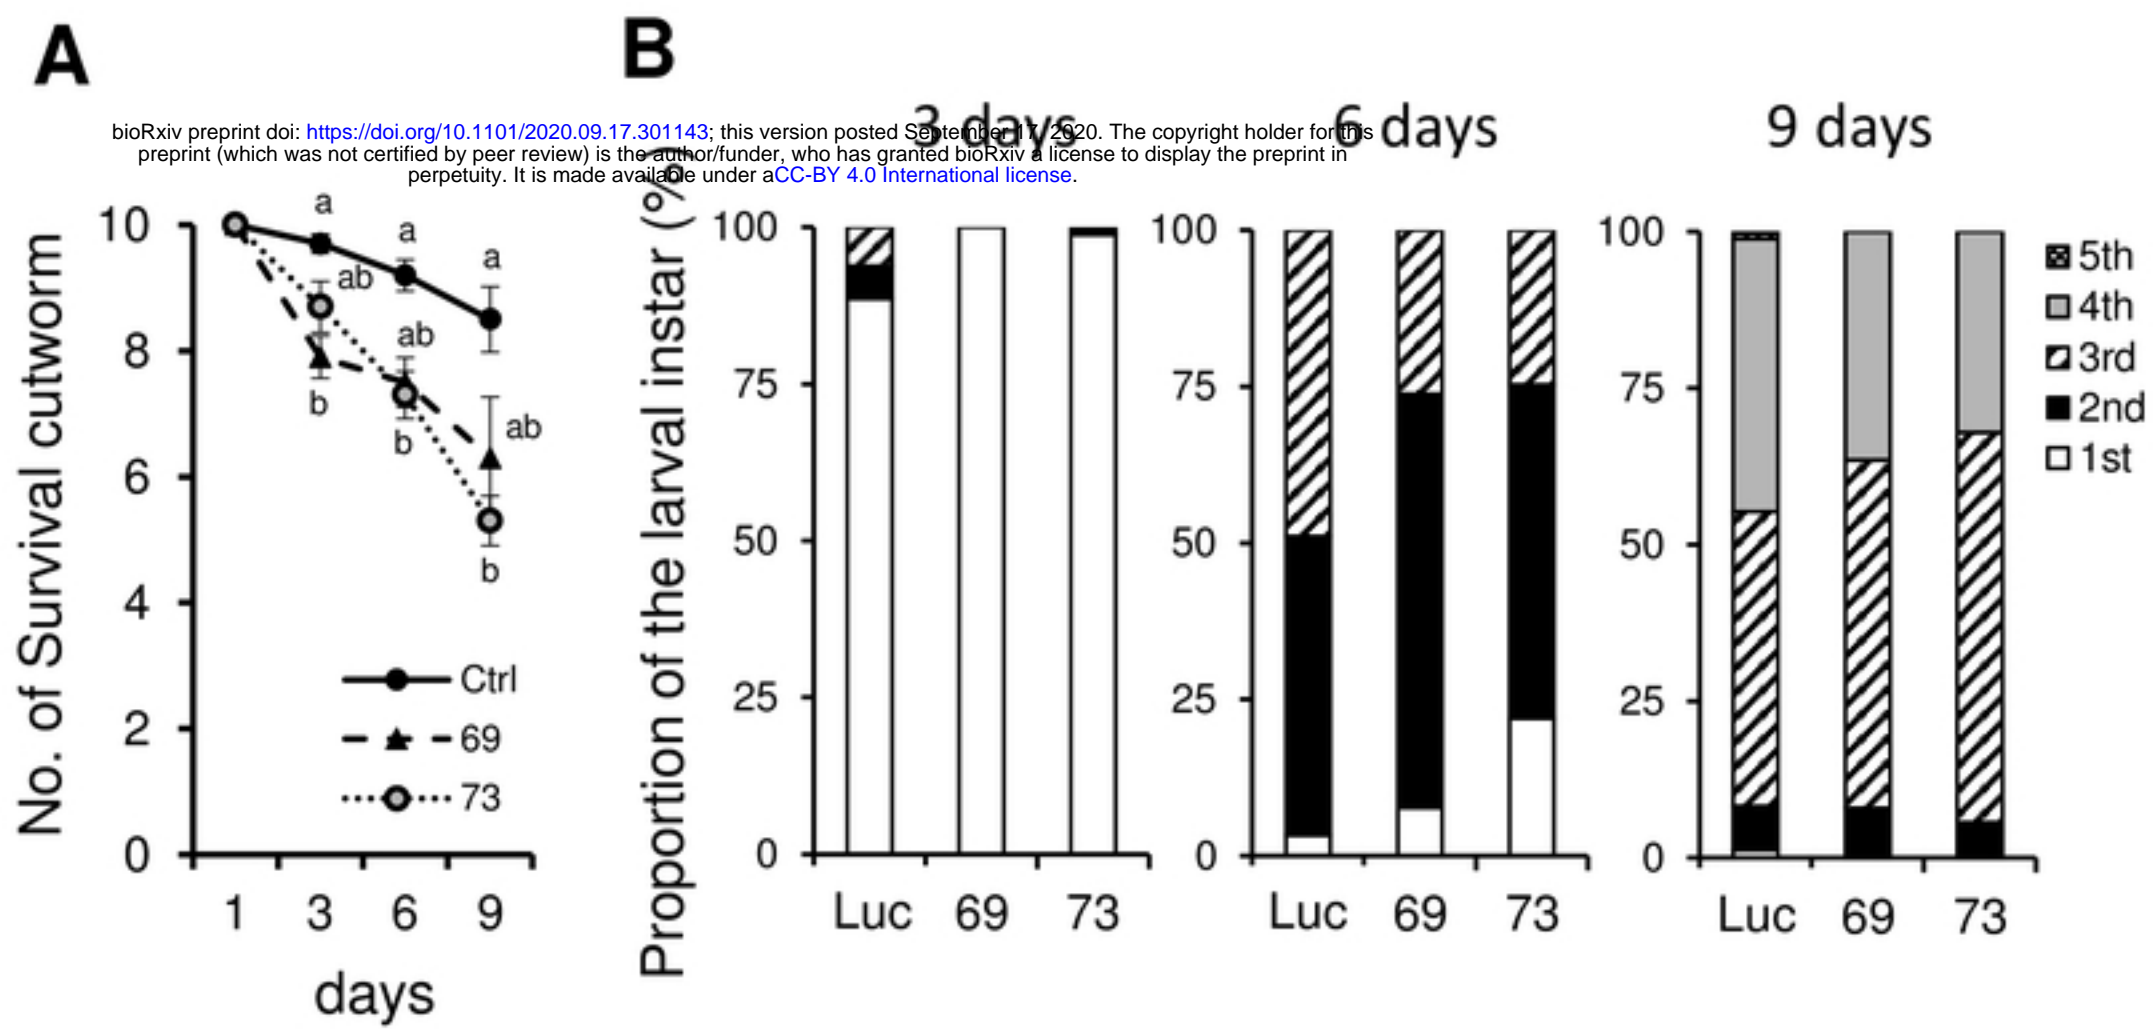

Fig.3

bioRxiv preprint doi: <https://doi.org/10.1101/2020.09.17.301143>; this version posted September 17, 2020. The copyright holder for this preprint (which was not certified by peer review) is the author/funder, who has granted bioRxiv a license to display the preprint in perpetuity. It is made available under aCC-BY 4.0 International license.

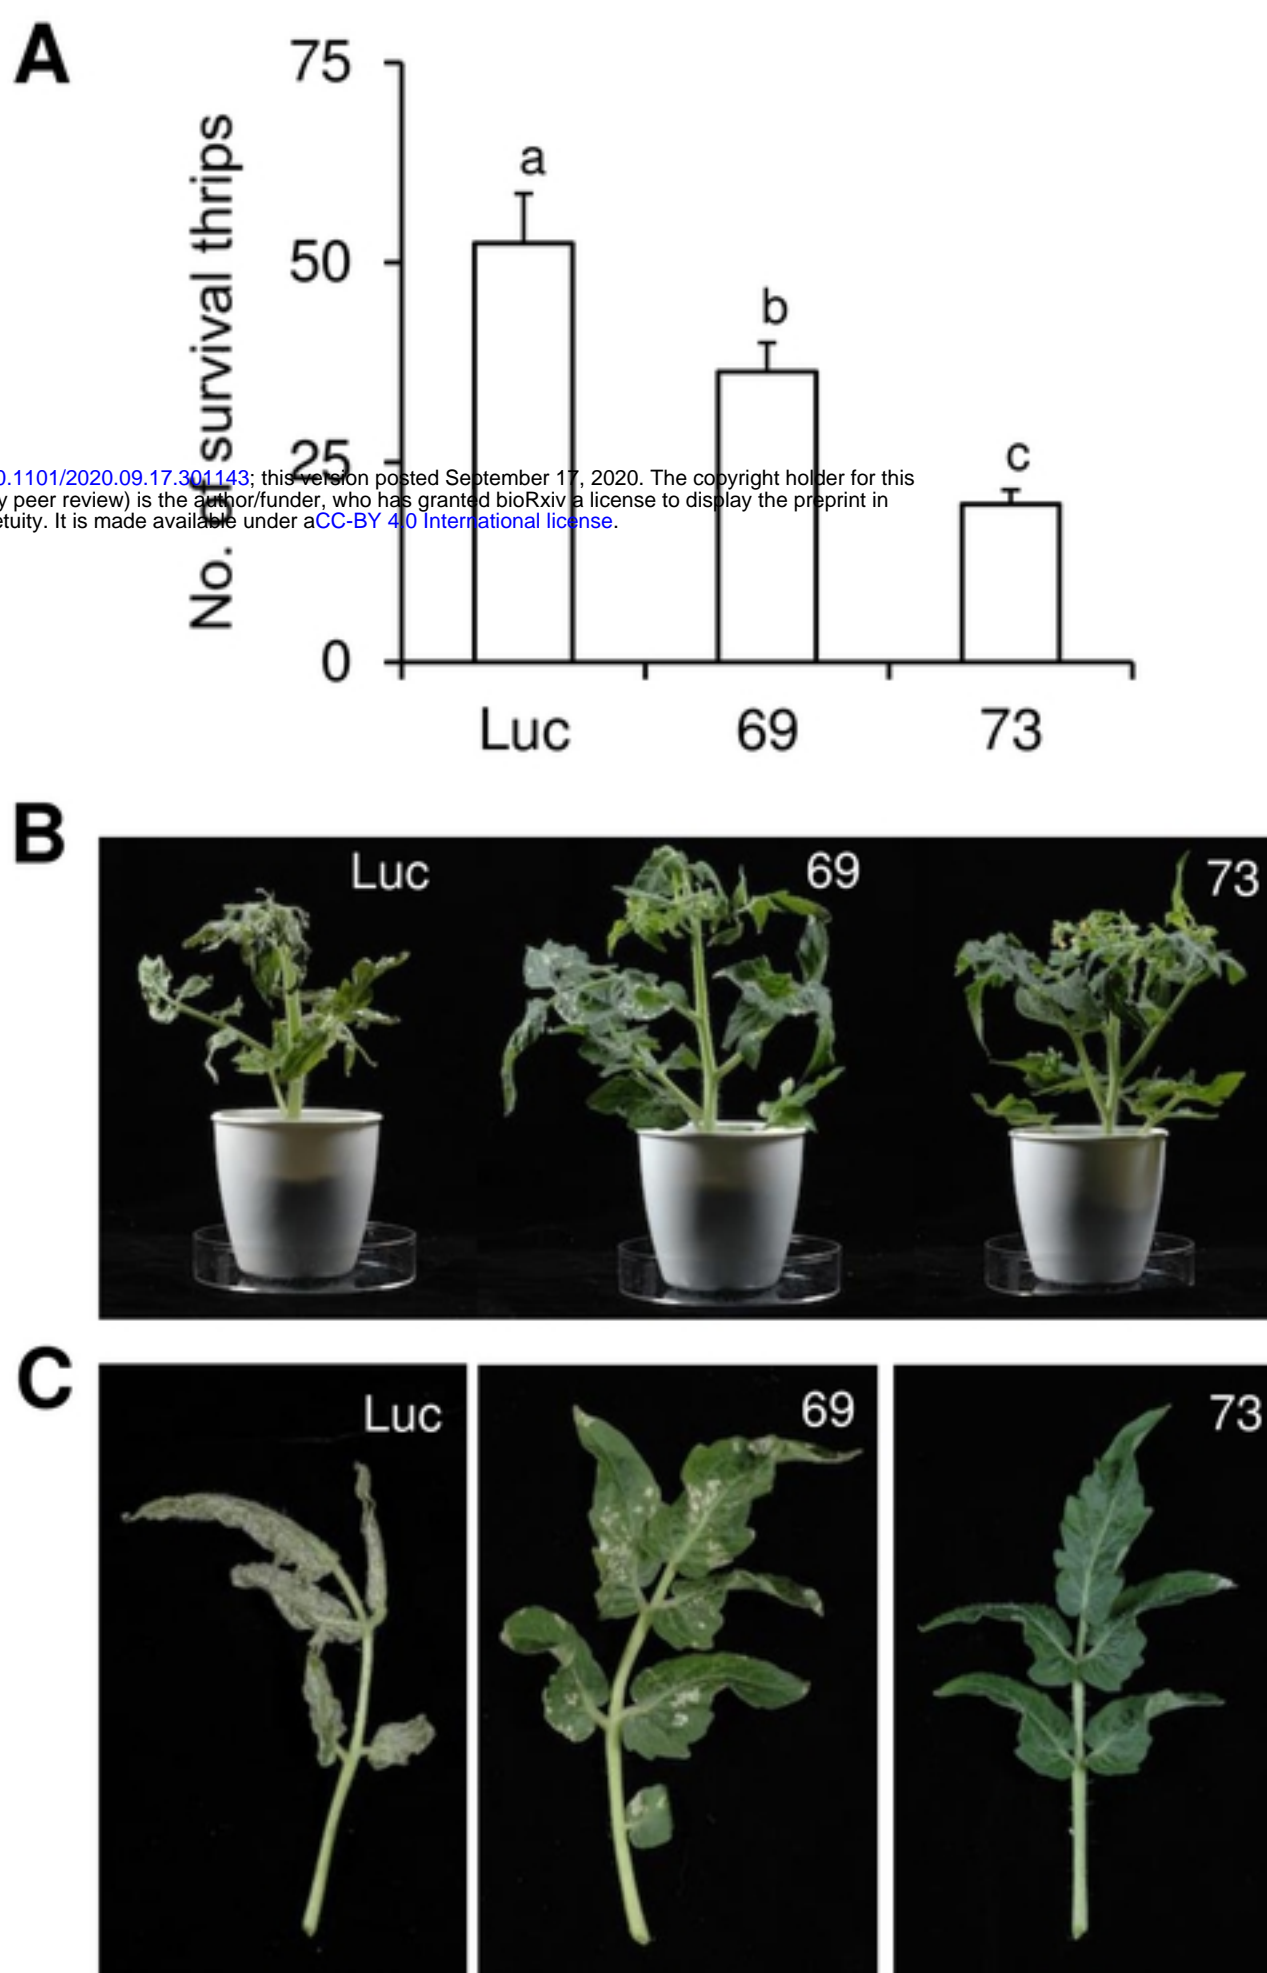

Fig.4



bioRxiv preprint doi: <https://doi.org/10.1101/2020.09.17.301143>; this version posted September 17, 2020. The copyright holder for this preprint (which was not certified by peer review) is the author/funder, who has granted bioRxiv a license to display the preprint in perpetuity. It is made available under aCC-BY 4.0 International license.

**A**

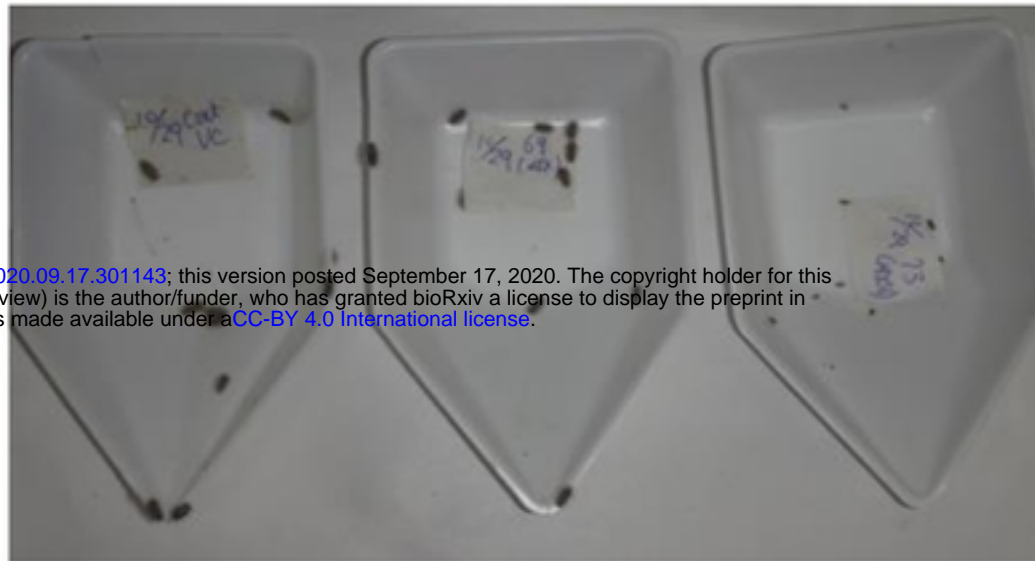

Luc

69

73

**B**

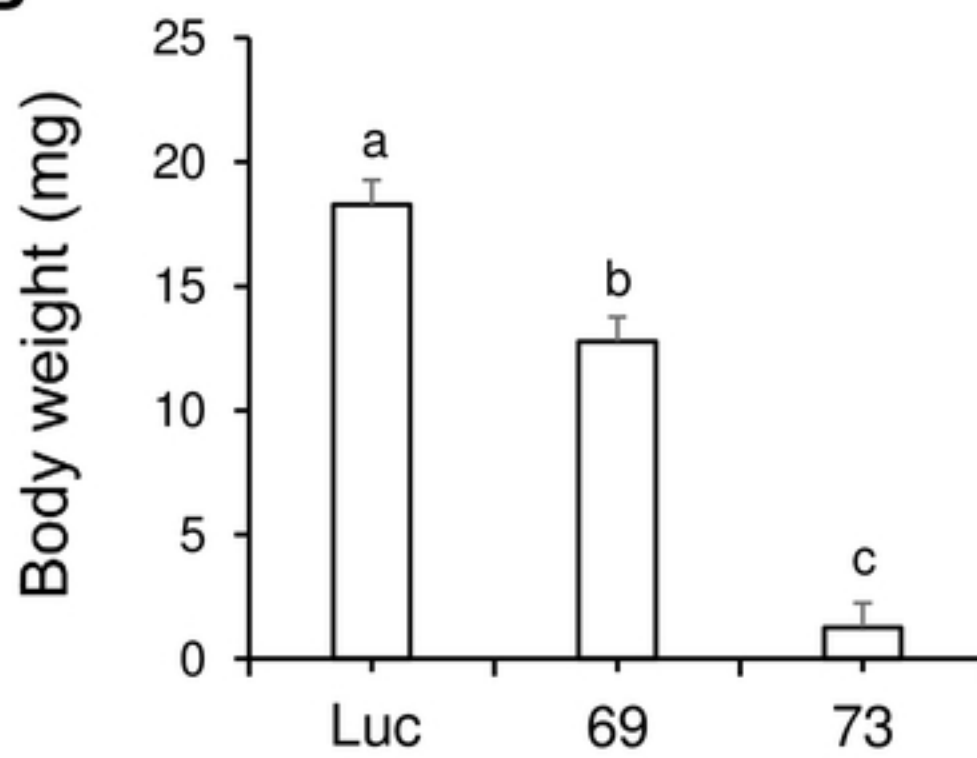

Source: http://biorxiv.org/content/10.1101/2020.09.17.301143v1.full.pdf
